# Supplementary material for: Superalkali halide perovskites with suitable direct band gaps for photovoltaic applications
Source: Royal Society of Chemistry journal article supplement (doi:10.1039/d3nr06132a), 2024-01-01
Supplement: d3nr06132a1.pdf [file d3nr06132a1.pdf]

## Supporting Information

### Superalkali halide perovskites with suitable direct band gaps for photovoltaic applications

Tingwei Zhou\*, Anlong Kuang

Chongqing key Laboratory of Micro&Nano Structure Optoelectronics, School of Physical Science and Technology, Southwest University, Chongqing 400715, China

Corresponding Author \*Email: twzhou@swu.edu.cn

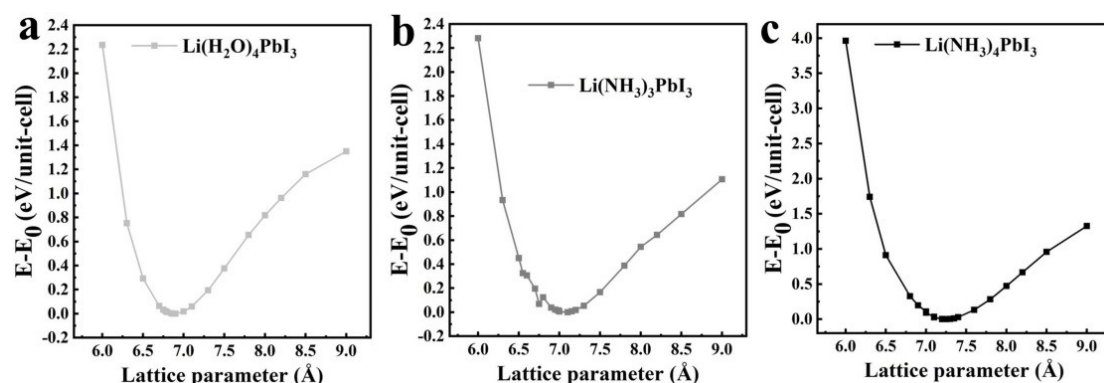

**Fig. S1** (a-c) The energies of the cubic  $\text{Li}(\text{H}_2\text{O})_4\text{PbI}_3$ ,  $\text{Li}(\text{NH}_3)_3\text{PbI}_3$  and  $\text{Li}(\text{NH}_3)_4\text{PbI}_3$  perovskites with different lattice parameters, their lowest energies are set to 0 eV/unit-cell, respectively.

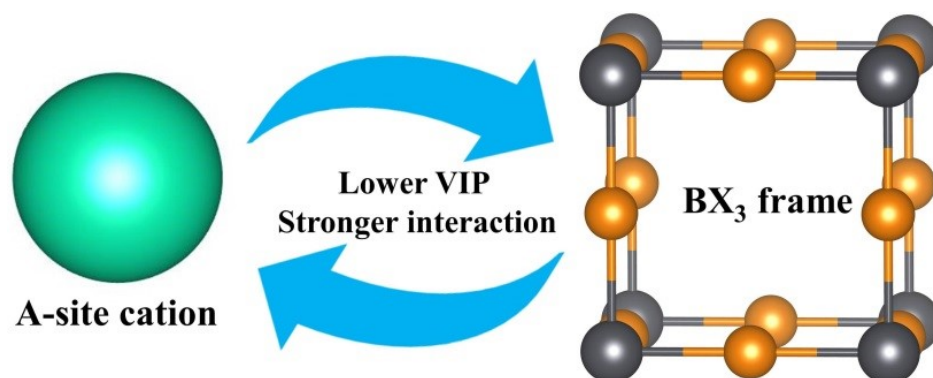

**Fig. S2** The diagram of A-site cations and the  $\text{BX}_3$  frame for the  $\text{AM}_3$  ( $\text{A} = \text{Cs}, \text{Li}(\text{H}_2\text{O})_3, \text{Li}(\text{H}_2\text{O})_4, \text{Li}(\text{NH}_3)_3$  and  $\text{Li}(\text{NH}_3)_4$ ,  $\text{M} = \text{Sn}$  and  $\text{Pb}$ ) perovskites.

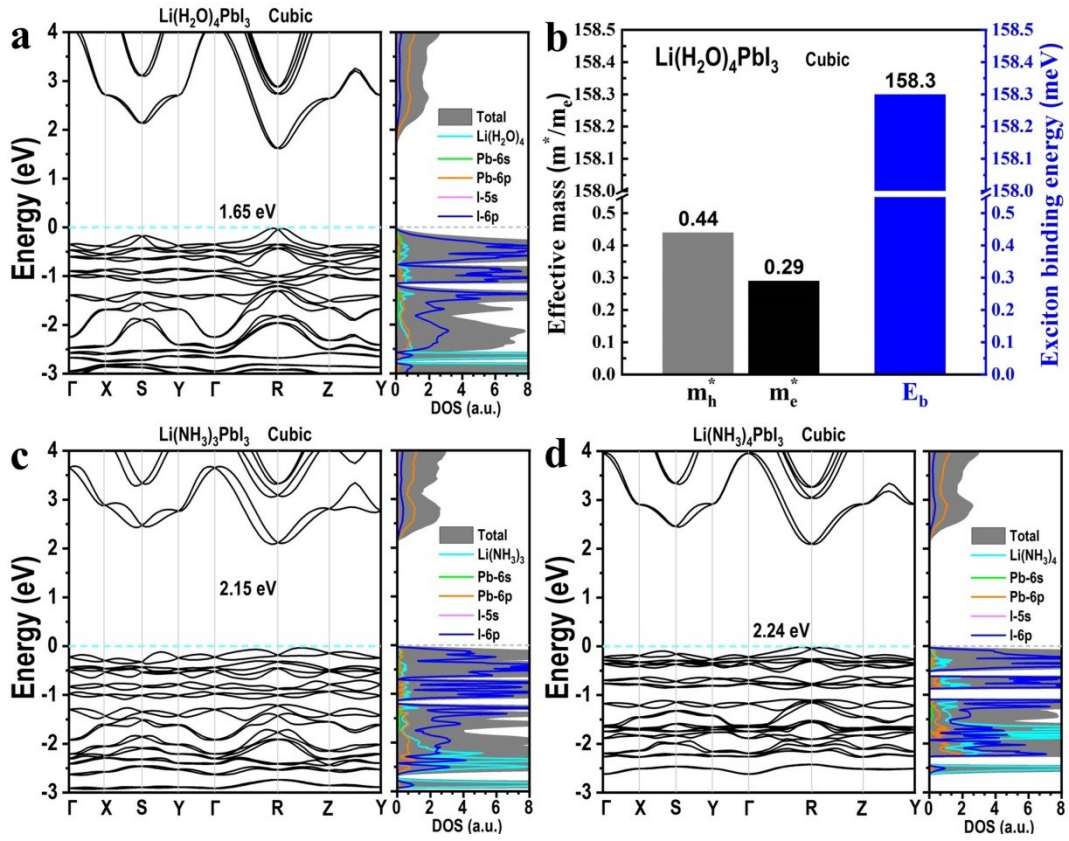

**Fig. S3** (a, c, d) The band structures, and total and partial DOSs for the cubic  $\text{Li}(\text{H}_2\text{O})_4\text{PbI}_3$ ,  $\text{Li}(\text{NH}_3)_3\text{PbI}_3$  and  $\text{Li}(\text{NH}_3)_4\text{PbI}_3$  perovskites, respectively. The dotted line represents Fermi level, which is set to zero. (b) The hole and electron effective masses ( $m_h^*$  and  $m_e^*$ ) and exciton binding energy ( $E_b$ ) of the cubic  $\text{Li}(\text{H}_2\text{O})_4\text{PbI}_3$  perovskites, respectively.

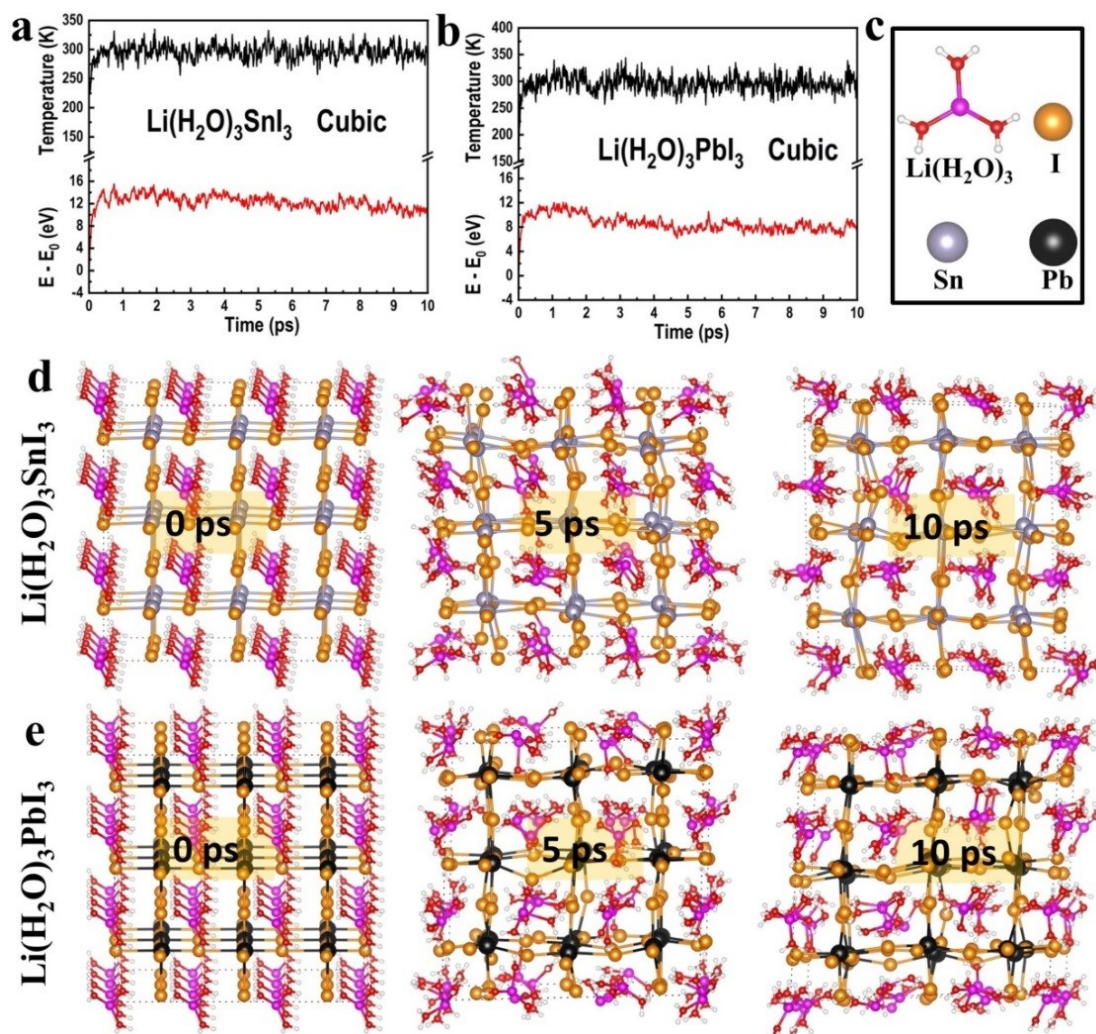

**Fig. S4** The AIMD simulated energy and temperature curves (a,b) and structures (d,e), the cubic  $\text{Li}(\text{H}_2\text{O})_3\text{SnI}_3$  and  $\text{Li}(\text{H}_2\text{O})_3\text{PbI}_3$  perovskites with a  $3 \times 3 \times 3$  supercell under 300 K and  $10^5$  Pa, respectively. Here,  $\text{Li}(\text{H}_2\text{O})_3$ , I, Sn and Pb is shown in the insert (c). Atomic colors: H (white), Li (purplish red), O (red), I (orange), Sn (silver) and Pb (black).
